# Supplementary material
Source: HighWire-hosted journal article supplement (https://cmaj.ca/highwire/filestream/147814/field_highwire_adjunct_files/0/220952-res-1.pdf)
Supplement: 220952-res-1.pdf [file 220952-res-1.pdf]

## Association between metformin use and risk of total joint replacement in patients with type 2 diabetes: a population-based matched cohort study

Zhaohua Zhu<sup>1#</sup>, PhD; Jing-Yang Huang<sup>2,3#</sup>, PhD; Guangfeng Ruan<sup>1#</sup>, MD; Peihua Cao<sup>1#</sup>, PhD; Shibo Chen<sup>1</sup>, MMed; Yan Zhang<sup>1</sup>, PhD; Weiyu Han<sup>1</sup>, MD, PhD; Tianyu Chen<sup>1</sup>, MD; Xiaoyan Cai<sup>4</sup>, MD; Jia Liu<sup>5</sup>, MD; Yujin Tang<sup>5</sup>, MD; Na Yu<sup>4</sup>, MD; Qian Wang<sup>1</sup>, MD, PhD; David J Hunter<sup>1,6</sup>, MD, PhD; James Cheng-Chung Wei<sup>3,7,8,9\*</sup>, MD, PhD; Changhai Ding<sup>1,4,5,10\*</sup>, MD, PhD

### Affiliations:

<sup>1</sup>Clinical Research Centre, Orthopedic Centre, Zhujiang Hospital, Southern Medical University, Guangzhou, China

<sup>2</sup>Department of Medical Research, Chung Shan Medical University Hospital, Taichung, Taiwan

<sup>3</sup>Institute of Medicine, Chung Shan Medical University, Taichung, Taiwan

<sup>4</sup>Department of Rheumatology, Guangzhou First People's Hospital, School of Medicine, South China University of Technology, Guangzhou, China

<sup>5</sup>Department of Orthopaedics, Affiliated Hospital of Youjiang Medical University for Nationalities, Baise, China

<sup>6</sup>Department of Rheumatology, Royal North Shore Hospital and Institute of Bone and Joint Research, Kolling Institute, University of Sydney, Sydney, Australia

<sup>7</sup>Department of Medicine, Chung Shan Medical University Hospital, Taichung, Taiwan <sup>8</sup>Graduate Institute of Integrated Medicine, China Medical University, Taichung, Taiwan

<sup>9</sup>Department of Medical Research, Taichung Veterans General Hospital, Taichung, Taiwan

<sup>10</sup>Menzies Institute for Medical Research, University of Tasmania, Hobart, Australia

#These authors contributed equally.

\*Correspondence: C. Ding. E-mail: [Changhai.Ding@utas.edu.au](mailto:Changhai.Ding@utas.edu.au) and JCC. Wei. E-mail: [jccwei@gmail.com](mailto:jccwei@gmail.com)

**Supplementary Table 1. Associations of metformin use with osteoarthritis-related total joint replacement**

|                                             | Prescription time-distribution matching cohort |                         | Propensity score matching cohort |                         |
|---------------------------------------------|------------------------------------------------|-------------------------|----------------------------------|-------------------------|
|                                             | Non-Metformin<br>n=20347                       | Metformin<br>n=20347    | Non-Metformin<br>n=10163         | Metformin<br>n=10163    |
| <b>OA-related TKR or THR</b>                |                                                |                         |                                  |                         |
| Number of event                             | 493                                            | 398                     | 241                              | 200                     |
| Incidence rate*(95% CI)                     | 4.42 (4.05-4.83)                               | 3.15 (2.86-3.48)        | 4.51 (3.97-5.11)                 | 3.35 (2.92-3.85)        |
| Crude HR (95% CI)                           | Reference                                      | <b>0.72 (0.63-0.82)</b> | Reference                        | <b>0.74 (0.62-0.90)</b> |
| aHR <sup>†</sup> (95 % CI)                  | Reference                                      | <b>0.72 (0.62-0.85)</b> | Reference                        | <b>0.73 (0.61-0.89)</b> |
| Competing outcome <sup>§</sup> aHR (95% CI) | Reference                                      | <b>0.81 (0.69-0.95)</b> | Reference                        | <b>0.80 (0.66-0.97)</b> |
| IPTW <sup>#</sup> aHR (95% CI)              | Reference                                      | <b>0.67 (0.54-0.83)</b> |                                  |                         |
| <b>OA-related TKR</b>                       |                                                |                         |                                  |                         |
| Number of event                             | 449                                            | 367                     | 226                              | 182                     |
| Incidence rate*(95% CI)                     | 4.03 (3.67-4.42)                               | 2.91 (2.62-3.22)        | 4.23 (3.71-4.81)                 | 3.05 (2.64-3.53)        |
| Crude HR (95% CI)                           | Reference                                      | <b>0.72 (0.63-0.83)</b> | Reference                        | <b>0.72 (0.59-0.88)</b> |
| aHR <sup>†</sup> (95 % CI)                  | Reference                                      | <b>0.73 (0.62-0.85)</b> | Reference                        | <b>0.71 (0.59-0.87)</b> |
| Competing outcome <sup>§</sup> aHR (95% CI) | Reference                                      | <b>0.81 (0.69-0.96)</b> | Reference                        | <b>0.78 (0.64-0.95)</b> |
| IPTW <sup>#</sup> aHR (95% CI)              | Reference                                      | <b>0.66 (0.53-0.83)</b> |                                  |                         |
| <b>OA-related THR</b>                       |                                                |                         |                                  |                         |
| Number of event                             | 44                                             | 31                      | 15                               | 18                      |
| Incidence rate*(95% CI)                     | 0.39 (0.29-0.53)                               | 0.25 (0.17-0.35)        | 0.28 (0.17-0.47)                 | 0.30 (0.19-0.48)        |
| Crude HR (95% CI)                           | Reference                                      | 0.63 (0.40-1.00)        | Reference                        | 1.09 (0.55-2.17)        |
| aHR <sup>†</sup> (95 % CI)                  | Reference                                      | 0.73 (0.43-1.26)        | Reference                        | 1.05 (0.53-2.09)        |
| Competing outcome <sup>§</sup> aHR (95% CI) | Reference                                      | 0.81 (0.48-1.37)        | Reference                        | 1.14 (0.57-2.28)        |
| IPTW <sup>#</sup> aHR (95% CI)              | Reference                                      | 0.82 (0.47-1.43)        |                                  |                         |

\* Incidence rate, per 10000 person-months.

<sup>†</sup>The co-variates included demographic variables (sex, age, urbanization, and insurance type), score of adapted Diabetes Complication Severity Index, comorbidities, medications for pain management, and other oral antihyperglycemic agents at baseline.

<sup>S</sup>When defined death, admission for lower limb fracture, amputation or non-OA related total joint replacement as competing-events. OA-related events included TKR or THR with primary diagnosis of ICD codes: 715.x. Non-OA-related events included TKR or THR with primary diagnosis of ICD codes: 733.x, 996.x, 716.x, 714.x, 274.x, 730.x, 755.x, 821.x, 711.x, 720.x, 736.x, 754.x, 820.x. OA, osteoarthritis; aHR, adjusted hazard ratio; TKR, total knee replacement; THR, total hip replacement; IPTW, inverse probability of treatment weighting.

#Balance diagnostics showed that covariates were well balanced between groups after IPTW.

Bold denotes statistical significance.

**Supplementary Table 2. The primary diagnosis when admission for total knee replacement, n=985**

| ICD-9 |                                                                           | n   |
|-------|---------------------------------------------------------------------------|-----|
| 715.3 | Osteoarthritis, localized, not specified whether primary or secondary     | 815 |
| 733.4 | Aseptic necrosis of bone                                                  | 50  |
| 715.1 | Osteoarthritis, localized, primary                                        | 34  |
| 715.9 | Osteoarthritis, unspecified whether generalized or localized              | 31  |
| 715.2 | Osteoarthritis, localized, secondary                                      | 11  |
| 996.4 | Mechanical complication of internal orthopedic device, implant, and graft | 9   |
| 714.0 | Rheumatoid arthritis                                                      | 7   |
| 716.1 | Traumatic arthropathy                                                     | 7   |
| 274.0 | Gouty arthropathy                                                         | 4   |
| 730.1 | Chronic osteomyelitis                                                     | 3   |

|       |                                                                                  |   |
|-------|----------------------------------------------------------------------------------|---|
| 755.6 | Other anomalies of lower limb, including pelvic girdle                           | 3 |
| 733.8 | Malunion and nonunion of fracture                                                | 2 |
| 821.0 | Shaft or unspecified part, closed                                                | 2 |
| 711.0 | Pyogenic arthritis                                                               | 1 |
| 716.9 | Arthropathy, unspecified                                                         | 1 |
| 720.0 | Ankylosing spondylitis                                                           | 1 |
| 736.3 | Acquired deformities of hip                                                      | 1 |
| 754.3 | Congenital dislocation of hip                                                    | 1 |
| 820.2 | Pertrochanteric fracture, closed                                                 | 1 |
| 996.5 | Mechanical complication of other specified prosthetic device, implant, and graft | 1 |

ICD-9 was ordered by frequency. ICD-9, International Classification of Diseases, Ninth Revision.

**Supplementary Table 3. The primary diagnosis when admission for total hip replacement, n=148**

| ICD-9 |                                                                           | n  |
|-------|---------------------------------------------------------------------------|----|
| 715.3 | Osteoarthritis, localized, not specified whether primary or secondary     | 64 |
| 733.4 | Aseptic necrosis of bone                                                  | 48 |
| 996.4 | Mechanical complication of internal orthopedic device, implant, and graft | 9  |

|       |                                                                                  |   |
|-------|----------------------------------------------------------------------------------|---|
| 715.2 | Osteoarthritis, localized, secondary                                             | 7 |
| 715.1 | Osteoarthritis, localized, primary                                               | 3 |
| 716.1 | Traumatic arthropathy                                                            | 3 |
| 755.6 | Other anomalies of lower limb, including pelvic girdle                           | 3 |
| 821.0 | Shaft or unspecified part, closed                                                | 2 |
| 711.0 | Pyogenic arthritis                                                               | 1 |
| 715.9 | Osteoarthritis, unspecified whether generalized or localized                     | 1 |
| 716.9 | Arthropathy, unspecified                                                         | 1 |
| 720.0 | Ankylosing spondylitis and other inflammatory spondylopathies                    | 1 |
| 730.1 | Chronic osteomyelitis                                                            | 1 |
| 733.8 | Malunion and nonunion of fracture                                                | 1 |
| 736.3 | Acquired deformities of hip                                                      | 1 |
| 754.3 | Congenital dislocation of hip                                                    | 1 |
| 996.5 | Mechanical complication of other specified prosthetic device, implant, and graft | 1 |

ICD-9 was ordered by frequency. ICD-9, International Classification of Diseases, Ninth Revision.

**Supplementary Table 4. Associations of metformin use with incidence of the hospitalization due to knee or hip osteoarthritis**

|                                             | Prescription time-distribution matching cohort |                         | Propensity score matching cohort |                          |
|---------------------------------------------|------------------------------------------------|-------------------------|----------------------------------|--------------------------|
|                                             | Non-Metformin<br>n=20347                       | Metformin<br>n=20347    | Non-Metformin<br>n=10163         | Metformin<br>n=10163     |
| <b>Median follow up months</b>              | 45                                             | 54                      | 42                               | 50                       |
| <b>Observed person-months</b>               | 1108877                                        | 1259813                 | 531635                           | 595409                   |
| <b>Admission for knee or hip OA</b>         |                                                |                         |                                  |                          |
| Number of event                             | 672                                            | 490                     | 324                              | 249                      |
| Incidence rate*(95% CI)                     | 6.06 (5.62-6.54)                               | 3.89 (3.56-4.25)        | 6.09 (5.47-6.80)                 | 4.18 (3.69-4.73)         |
| Crude HR (95% CI)                           | Reference                                      | <b>0.65 (0.58-0.73)</b> | Reference                        | <b>0.690 (0.59-0.82)</b> |
| aHR <sup>†</sup> (95% CI)                   | Reference                                      | <b>0.67 (0.58-0.76)</b> | Reference                        | <b>0.681 (0.58-0.80)</b> |
| Competing outcome <sup>§</sup> aHR (95% CI) | Reference                                      | <b>0.68 (0.59-0.77)</b> | Reference                        | <b>0.740 (0.63-0.87)</b> |
| IPTW <sup>#</sup> aHR (95% CI)              | Reference                                      | <b>0.65 (0.56-0.76)</b> |                                  |                          |
| <b>Admission for knee OA</b>                |                                                |                         |                                  |                          |
| Number of event                             | 566                                            | 432                     | 280                              | 214                      |
| Incidence rate*(95% CI)                     | 5.10 (4.70-5.54)                               | 3.43 (3.12-3.77)        | 5.27 (4.68-5.92)                 | 3.59 (3.14-4.11)         |
| Crude HR (95% CI)                           | Reference                                      | <b>0.68 (0.56-0.77)</b> | Reference                        | <b>0.68 (0.57-0.82)</b>  |
| aHR <sup>†</sup> (95% CI)                   | Reference                                      | <b>0.68 (0.59-0.79)</b> | Reference                        | <b>0.68 (0.57-0.81)</b>  |
| Competing outcome <sup>§</sup> aHR (95% CI) | Reference                                      | <b>0.71 (0.62-0.82)</b> | Reference                        | <b>0.74(0.62-0.88)</b>   |
| IPTW <sup>#</sup> aHR (95% CI)              | Reference                                      | <b>0.67 (0.57-0.78)</b> |                                  |                          |
| <b>Admission for hip OA</b>                 |                                                |                         |                                  |                          |
| Number of event                             | 107                                            | 60                      | 44                               | 36                       |
| Incidence rate*(95% CI)                     | 0.96 (0.80-1.17)                               | 0.48 (0.37-0.61)        | 0.83 (0.62-1.11)                 | 0.60 (0.44-0.84)         |
| Crude HR (95% CI)                           | Reference                                      | <b>0.51 (0.37-0.70)</b> | Reference                        | 0.75 (0.48-1.16)         |
| aHR <sup>†</sup> (95% CI)                   | Reference                                      | <b>0.59 (0.41-0.85)</b> | Reference                        | 0.73 (0.47-1.13)         |
| Competing outcome <sup>§</sup> aHR (95% CI) | Reference                                      | <b>0.51 (0.35-0.74)</b> | Reference                        | 0.80 (0.51-1.24)         |
| IPTW <sup>#</sup> aHR (95% CI)              | Reference                                      | <b>0.60 (0.41-0.87)</b> |                                  |                          |

\*Incidence rate, per 10000 person-months.

<sup>†</sup>The co-variables including demographic variables (sex, age, urbanization, and insurance type), score of adapted Diabetes Complication Severity Index, comorbidities, medications for pain management, and other oral antihyperglycemic agents at baseline.

<sup>§</sup>When further defined non-OA related hospitalization as competing-events (rheumatoid arthritis, gout and osteoporosis).

<sup>#</sup>Balance diagnostics showed that covariates were well balanced between groups after IPTW.

OA, osteoarthritis; aHR, adjusted hazard ratio; IPTW, inverse probability of treatment weighting; TKR, total knee replacement; THR, total hip replacement.  
Bold denotes statistical significance.



After exclusion, a total of 62310 patients who were newly diagnosed with T2DM between 2000 and 2013 were selected for prescription time-distribution matching.

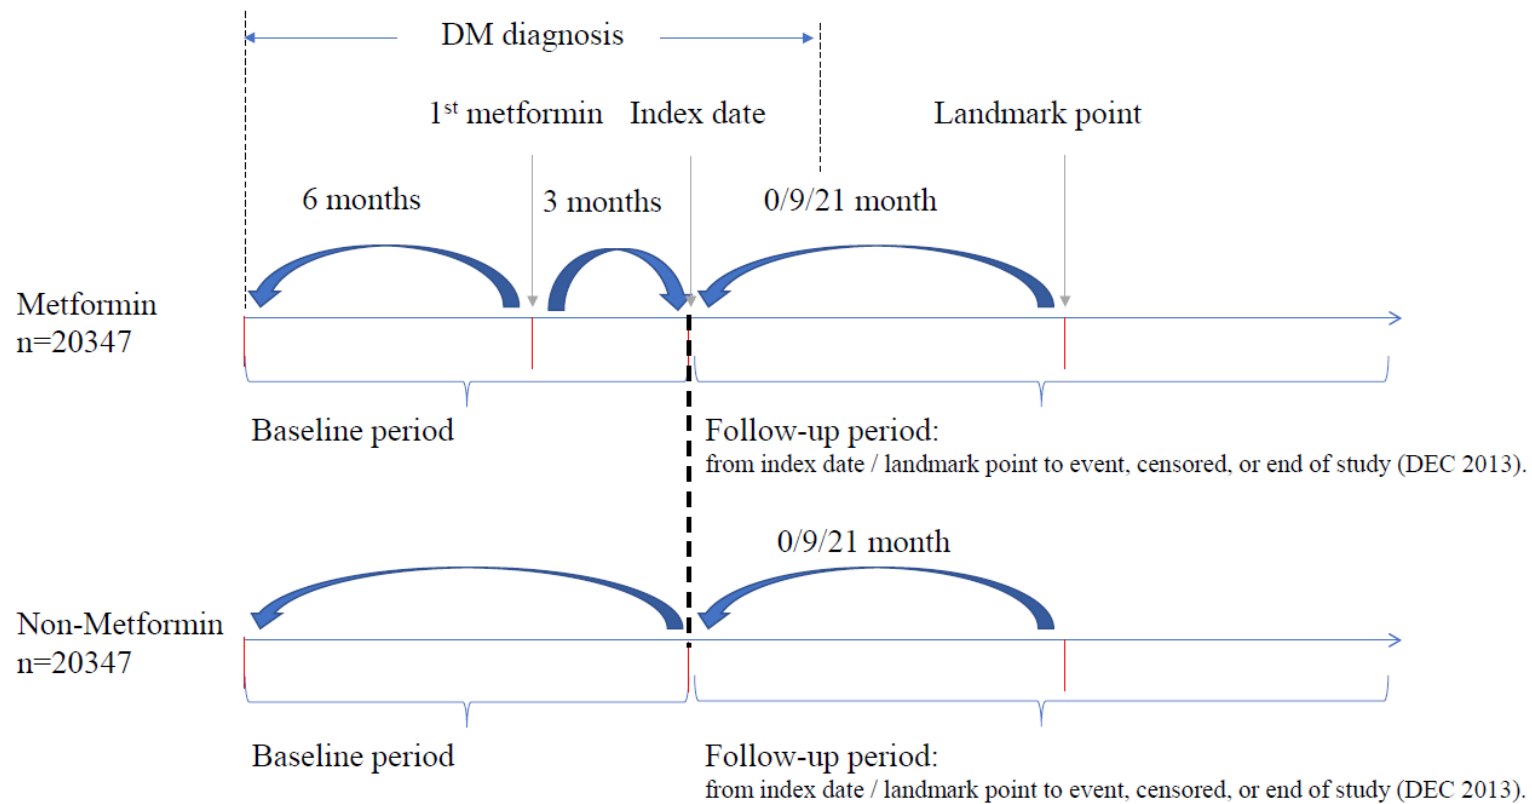

**Supplementary Figure 1. Time schedule since the diagnosis of diabetes mellitus in metformin users (above) or non-users (below) during 2000 to 2013.**

The index date was defined as 3 months after the first prescription of metformin. The duration from 9-month before index date to the index date were defined as baseline period. The landmark points were 3, 12 and 24 months after the first prescription of metformin.

(a) Landmark=index date

(b) Landmark=index date+9 months

(c) Landmark=index date+21 months

TKR or THR

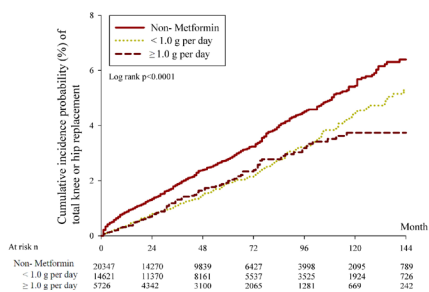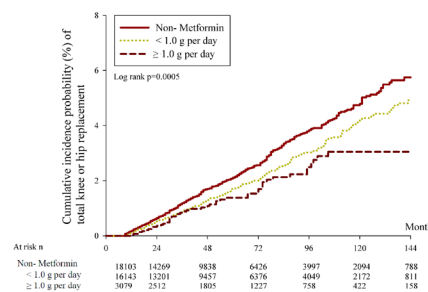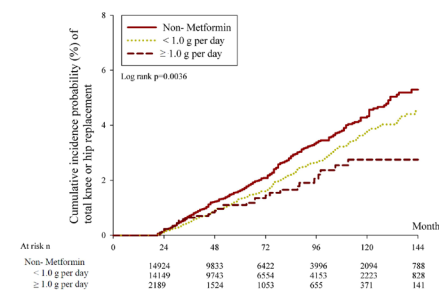

TKR

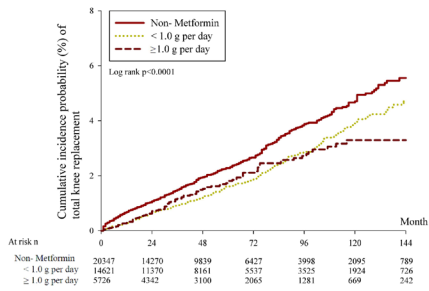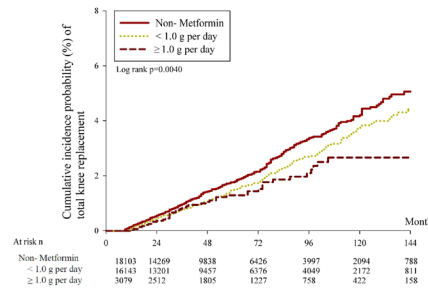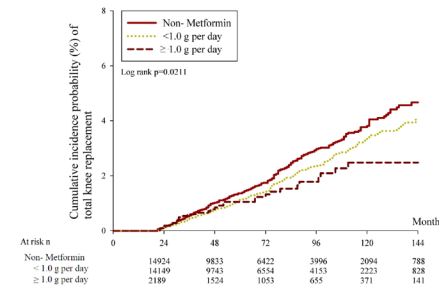

THR

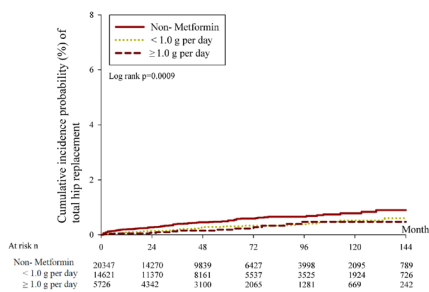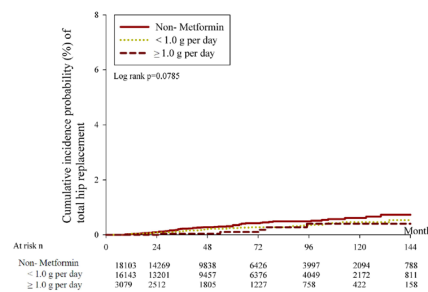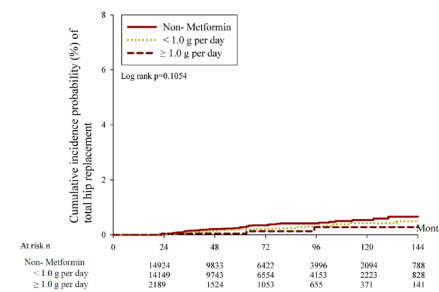

**Supplementary Figure 2. Cumulative probability of total joint replacement in metformin (2 dosages) users or non-users.** (a) metformin average daily dosage (gram per day) estimated during the period from first prescription to 3 months; (b) metformin average daily dosage estimated during the period from first prescription to 12 months landmark point; (c) metformin average daily dosage estimated during the period from first prescription to 24 months landmark point. The log-rank tests were conducted to compare the

distributions of cumulative incidence curves that estimated by the Kaplan-Meier method between 3 groups (Non-metformin, metformin < 1 g / day, and  $\geq 1$  g / day).
